# Supplementary material for: Trauma-related emotions and radical acceptance in dialectical behavior therapy for posttraumatic stress disorder after childhood sexual abuse
Source: Borderline Personal Disord Emot Dysregul. 2017 Jul 13;4:15. doi: 10.1186/s40479-017-0065-5 (PMC5508787; doi:10.1186/s40479-017-0065-5)
Supplement: Additional file 1: — Model notation: Notation for the four multilevel models used to test the main hypotheses. (DOCX 19 kb) [file 40479_2017_65_MOESM1_ESM.docx]

Additional File to Görg, N., Priebe, K., Böhnke, J.R., Steil, R., Dyer, A.S. & Kleindienst, N. Trauma-related Emotions and Radical Acceptance in Dialectical Behavior Therapy for Posttraumatic Stress Disorder after Childhood Sexual Abuse. *Borderline Personality Disorder and Emotion Dysregulation*, accepted.

**Additional file: Model notation**

Notation for the four multilevel models used to test the main hypotheses.

The overall structure is that several observations (*i* ; up to seven, see Figure 1) are nested within *j* patients. In model 1 the dependent variable is either a score of trauma-related emotions or acceptance. It is predicted by a patient-specific intercept (*β*0j), which again is predicted by an overall mean across all patients (γ00). The two error terms of this model (*ε*ij patient-specific residual; *τ*00 variance of patients' mean levels around the overall mean) can be used to estimate the intraclass correlation.

In model 2, the treatment phase of the individual assessment is used as a within-patient predictor (0 = start of treatment; 1 = end of treatment). The corresponding fixed effect γ10 estimates the overall effect of time in treatment.

In models 3 and 4, the change in CAPS was added either as a dichotomized predictor (model 3 in text) or as a continuous change variable (model 4 in text). In either case, the corresponding fixed effect of γ01 provides the information of how much of an effect between-patient differences in attaining the treatment goal had above and beyond individual variation in change (captured in model 2 and by *β*1j in this model).

Model 1:

Eq. (A.1): yij = βoj + εij

Eq. (A.2): β0j = γ00 + τ00

Model 2:

Eq. (B.1): yij = β0j + βljlate + εij

Eq. (B.2): β0j = γ00 + τ00

Eq. (B.3): βlj = γ10 + τ10

Model 3/ Model 4:

Eq. (C.1): yij = β0j + βljlate + εij

Eq. (C.2): β0j = γ00 + γ01CAPS + τ00

Eq. (C.3): βlj = γ10 + τ10
